# Supplementary material for: Non-radiative deactivation in phenol–pyridine complex: theoretical study
Source: Royal Society of Chemistry journal article supplement (doi:10.1039/c4pp00199k), 2015-04-29
Supplement: c4pp00199k1.pdf [file c4pp00199k1.pdf]

## Supporting information

# Non-radiative deactivation in phenol-pyridine complex: Theoretical study

Mounir Esbouia,b\* and Nejmeddine Jaidane<sup>a</sup>

<sup>a</sup> Laboratoire de Spectroscopie Atomique, Moléculaire et Applications, Département de Physique, Faculté des Sciences de Tunis, 2092 Tunis, Tunisia.

<sup>b</sup> Technical and Vocational Training Corporation, Hail College of Technology, P. O. Box 1960 Hail 81441, Kingdom of Saudi Arabia.

(\*) Corresponding Author : Mounir Esboui

Phone : +966 542427898.

E-mail address: [mounir.esboui@fst.rnu.tn](mailto:mounir.esboui@fst.rnu.tn) mounir.esboui@fst.rnu.tn

## Excited state minimum geometries of complexes computed at RICC2/aug-cc-pVDZ level of theory

### A1) Optimized geometry of Pl conformer of PhOH-Py complex in it's ground state.

|                    |                   |                  |   |
|--------------------|-------------------|------------------|---|
| 3.30411998112754   | 1.50655513190764  | 0.00000000000000 | c |
| 3.47728002451601   | -1.15570421852682 | 0.00000000000000 | c |
| 5.87519276250998   | -2.31640957750220 | 0.00000000000000 | c |
| 8.07239000265813   | -0.82554004084668 | 0.00000000000000 | c |
| 7.90953306686495   | 1.83150882038002  | 0.00000000000000 | c |
| 5.51417879352451   | 2.98487973785200  | 0.00000000000000 | c |
| 1.39631485778605   | -2.68751862617761 | 0.00000000000000 | o |
| -3.28914201267009  | -0.32032672115505 | 0.00000000000000 | n |
| -4.14900573135674  | 2.08466324452272  | 0.00000000000000 | c |
| -6.73084622583976  | 2.70109854341839  | 0.00000000000000 | c |
| -8.51414127827387  | 0.73404273753365  | 0.00000000000000 | c |
| -7.63411949184136  | -1.77087999185743 | 0.00000000000000 | c |
| -5.01546145508442  | -2.20530524459169 | 0.00000000000000 | c |
| -7.31945818279146  | 4.68065098871082  | 0.00000000000000 | h |
| -2.71088695241890  | 3.57057561704040  | 0.00000000000000 | h |
| -4.25216396972842  | -4.12756975847586 | 0.00000000000000 | h |
| -8.94511335803477  | -3.36689383574178 | 0.00000000000000 | h |
| -10.53967676381905 | 1.14339511613477  | 0.00000000000000 | h |
| -0.14667614369122  | -1.62667621832052 | 0.00000000000000 | h |
| 1.44258837689414   | 2.40550415918564  | 0.00000000000000 | h |
| 5.35599642129077   | 5.04696612400334  | 0.00000000000000 | h |
| 9.62400833362227   | 2.98465159162553  | 0.00000000000000 | h |
| 9.92326686324762   | -1.74818039310907 | 0.00000000000000 | h |
| 5.97765476106584   | -4.38024063912939 | 0.00000000000000 | h |

### A2) Optimized geometry of Pe conformer of PhOH-Py complex in it's ground state.

|                   |                   |                   |   |
|-------------------|-------------------|-------------------|---|
| -5.95855839534048 | 1.96130956107107  | 0.00000000000000  | c |
| -6.48094888032386 | 3.96077401441344  | 0.00000000000000  | h |
| -7.80458061226167 | 0.05295051342221  | 0.00000000000000  | c |
| -9.80502645857868 | 0.57791263126260  | 0.00000000000000  | h |
| -7.10121626603339 | -2.51458007262531 | 0.00000000000000  | c |
| -8.54277115605477 | -3.99498740111001 | 0.00000000000000  | h |
| -4.51986300657963 | -3.15011260936486 | 0.00000000000000  | c |
| -3.94182677696218 | -5.13615611563759 | 0.00000000000000  | h |
| -2.65459602878477 | -1.25361795914615 | 0.00000000000000  | c |
| -0.65091674840901 | -1.75858381740781 | 0.00000000000000  | h |
| -3.37236334755361 | 1.31848671452847  | 0.00000000000000  | c |
| -1.66068246830408 | 3.25782648302508  | 0.00000000000000  | o |
| 0.07689839418621  | 2.55590037623582  | 0.00000000000000  | h |
| 3.19382876247385  | 1.25244569759183  | 0.00000000000000  | n |
| 4.33373787852296  | 0.59495814493630  | -2.19077397975117 | c |
| 4.33373787852296  | 0.59495814493630  | 2.19077397975117  | c |
| 3.35250210596763  | 1.15218794648011  | 3.92403786603767  | h |
| 3.35250210596763  | 1.15218794648011  | -3.92403786603767 | h |
| 6.63224637518721  | -0.73020343294036 | -2.28225691978372 | c |
| 6.63224637518721  | -0.73020343294036 | 2.28225691978372  | c |
| 7.47083139105818  | -1.21818583084232 | 4.10579733597807  | h |
| 7.47083139105818  | -1.21818583084232 | -4.10579733597807 | h |
| 7.80752696661875  | -1.40940596147583 | 0.00000000000000  | c |
| 9.59653987118560  | -2.44375355507750 | 0.00000000000000  | h |

**B1) Optimized geometry of Pl conformer of PhOH-Py complex in it's A'(1 $\pi\pi^*$ (LE)) singlet excited state.**

|                    |                   |                  |   |
|--------------------|-------------------|------------------|---|
| 3.14374562665133   | 1.59962739637671  | 0.00000000000000 | c |
| 3.38681723656008   | -1.12486852343661 | 0.00000000000000 | c |
| 5.76890998218161   | -2.41428786507331 | 0.00000000000000 | c |
| 8.04676896415762   | -0.91684237328027 | 0.00000000000000 | c |
| 7.82766370479000   | 1.78061074371677  | 0.00000000000000 | c |
| 5.43492563987092   | 3.06260268285676  | 0.00000000000000 | c |
| 1.30464190392050   | -2.59397643963313 | 0.00000000000000 | o |
| -3.18716634576909  | -0.37301123947266 | 0.00000000000000 | n |
| -4.00993404581344  | 2.05373346635033  | 0.00000000000000 | c |
| -6.58245703108567  | 2.70642948142885  | 0.00000000000000 | c |
| -8.39665517589222  | 0.75857869569395  | 0.00000000000000 | c |
| -7.55942879679058  | -1.76457686101055 | 0.00000000000000 | c |
| -4.94622630391549  | -2.23921185361852 | 0.00000000000000 | c |
| -7.14357407897516  | 4.69432560428278  | 0.00000000000000 | h |
| -2.54464267340633  | 3.51314483562529  | 0.00000000000000 | h |
| -4.20635833949747  | -4.17161654006538 | 0.00000000000000 | h |
| -8.89646488747775  | -3.33949896833123 | 0.00000000000000 | h |
| -10.41636832520073 | 1.19940473981497  | 0.00000000000000 | h |
| -0.29080530742960  | -1.49016702922950 | 0.00000000000000 | h |
| 1.27238288911131   | 2.46643627698548  | 0.00000000000000 | h |
| 5.37424975856505   | 5.12740619410654  | 0.00000000000000 | h |
| 9.55597533149564   | 2.92079428383094  | 0.00000000000000 | h |
| 9.90729161545986   | -1.81188702269189 | 0.00000000000000 | h |
| 5.77622736978663   | -4.47909916074000 | 0.00000000000000 | h |

**B2) Optimized geometry of PhO•...HPy• bi-radical (Pl conformer) in it's A'(1 $\pi\pi^*$ (CT)) singlet excited state computed at RICC2/aug-cc-pVDZ level of theory.**

|                    |                   |                  |   |
|--------------------|-------------------|------------------|---|
| -5.93543398146233  | -2.37929996396748 | 0.00000000000000 | c |
| -4.12560853843348  | -0.42317052941927 | 0.00000000000000 | n |
| -4.91873532651140  | 2.11977667116397  | 0.00000000000000 | c |
| -7.45905609798168  | 2.70347150584499  | 0.00000000000000 | c |
| -9.35643626636460  | 0.76085374113825  | 0.00000000000000 | c |
| -8.47889501617343  | -1.81014159420635 | 0.00000000000000 | c |
| 2.08484180513922   | -2.44594653501562 | 0.00000000000000 | o |
| 4.15206711208503   | -1.10499101146958 | 0.00000000000000 | c |
| 4.06007750088885   | 1.61432130814601  | 0.00000000000000 | c |
| 6.29700845569903   | 3.00760686784667  | 0.00000000000000 | c |
| 8.65368852572490   | 1.72618298445750  | 0.00000000000000 | c |
| 8.79223441315550   | -0.94465547496909 | 0.00000000000000 | c |
| 6.56310270415600   | -2.36262416802979 | 0.00000000000000 | c |
| -7.99305269275186  | 4.70284136134456  | 0.00000000000000 | h |
| -3.42490976820725  | 3.54138104567647  | 0.00000000000000 | h |
| -5.19002235298660  | -4.30215468525045 | 0.00000000000000 | h |
| -9.82183692620701  | -3.38467875259917 | 0.00000000000000 | h |
| -11.37019312037468 | 1.21671801811004  | 0.00000000000000 | h |
| -2.25203304068533  | -0.85832870413370 | 0.00000000000000 | h |
| 2.19819554452900   | 2.51080303555424  | 0.00000000000000 | h |
| 6.24960479986461   | 5.07434117336039  | 0.00000000000000 | h |
| 10.40308669869924  | 2.83088665228855  | 0.00000000000000 | h |
| 10.63464509815068  | -1.88285396767993 | 0.00000000000000 | h |
| 6.56645382755281   | -4.43119257398512 | 0.00000000000000 | h |

**B3) Optimized geometry of PhO•...HPy• bi-radical (Pl conformer) in it's A"( $^1\pi\sigma^*$ ) singlet excited state computed at RICC2/aug-cc-pVDZ level of theory.**

|                    |                   |                  |   |
|--------------------|-------------------|------------------|---|
| 4.16546511652912   | 2.01415566340502  | 0.00000000000000 | c |
| 3.57495903075754   | -0.64065206716822 | 0.00000000000000 | c |
| 5.58630949227577   | -2.46853759850701 | 0.00000000000000 | c |
| 8.09821520236761   | -1.65583428350469 | 0.00000000000000 | c |
| 8.64184443690465   | 0.96565988386976  | 0.00000000000000 | c |
| 6.68333725507544   | 2.79628693918977  | 0.00000000000000 | c |
| 1.23025748314644   | -1.42336305422277 | 0.00000000000000 | o |
| -3.70338257967563  | 0.23618750277790  | 0.00000000000000 | n |
| -5.04524703158602  | 2.41935481005819  | 0.00000000000000 | c |
| -7.68518241691950  | 2.32920461773743  | 0.00000000000000 | c |
| -8.89991892029876  | -0.03131944511281 | 0.00000000000000 | c |
| -7.44303546732834  | -2.26632352089638 | 0.00000000000000 | c |
| -4.81428941194170  | -2.08093631980581 | 0.00000000000000 | c |
| -8.75096966309441  | 4.10263985914066  | 0.00000000000000 | h |
| -3.94628067731024  | 4.17604848548113  | 0.00000000000000 | h |
| -3.52852335548195  | -3.69574546727467 | 0.00000000000000 | h |
| -8.33246457483546  | -4.13179536406841 | 0.00000000000000 | h |
| -10.96890076504697 | -0.13881960210393 | 0.00000000000000 | h |
| -1.72513509843487  | 0.27343856296895  | 0.00000000000000 | h |
| 2.59915940799975   | 3.36646405896048  | 0.00000000000000 | h |
| 7.14905430969433   | 4.81079653808454  | 0.00000000000000 | h |
| 10.61407052901374  | 1.59275651858665  | 0.00000000000000 | h |
| 9.64355014225379   | -3.02968614399327 | 0.00000000000000 | h |
| 5.07116009815215   | -4.47219862030544 | 0.00000000000000 | h |

**C1) Optimized geometry of PhO•...HPy• bi-radical (Pe conformer) in it's A" singlet excited state computed at RICC2/aug-cc-pVDZ level of theory.**

|                   |                   |                   |   |
|-------------------|-------------------|-------------------|---|
| -1.79006211086663 | -0.77049011337995 | 0.00000000000000  | c |
| 0.27234518698727  | -0.79800688402697 | 0.00000000000000  | h |
| -3.19183168916300 | -3.00425807665567 | 0.00000000000000  | c |
| -2.22001986518086 | -4.82759531557001 | 0.00000000000000  | h |
| -5.87337587119463 | -2.90304475849248 | 0.00000000000000  | c |
| -6.94853924597689 | -4.67065949688888 | 0.00000000000000  | h |
| -7.18442454369264 | -0.58009552521256 | 0.00000000000000  | c |
| -9.25143625481466 | -0.54651842464333 | 0.00000000000000  | h |
| -5.80409157477780 | 1.67694745615452  | 0.00000000000000  | c |
| -6.71951305866069 | 3.53159977940594  | 0.00000000000000  | h |
| -3.10703211965954 | 1.59187524708890  | 0.00000000000000  | c |
| -1.83771721117224 | 3.82026142430042  | 0.00000000000000  | o |
| 2.33513951931536  | 3.54874797341607  | 0.00000000000000  | h |
| 3.94544559614401  | 2.46699638965495  | 0.00000000000000  | n |
| 4.40571288756171  | 1.12771962715304  | 2.30205636825320  | c |
| 4.14515999049930  | 2.22761816685620  | 4.03099943913537  | h |
| 5.14736484634867  | -1.36934112604795 | 2.30854434659079  | c |
| 5.52321645591279  | -2.26134097659050 | 4.13966199282045  | h |
| 5.45164967105113  | -2.77349294583366 | 0.00000000000000  | c |
| 6.05501392807683  | -4.74771629019984 | 0.00000000000000  | h |
| 5.14736484634867  | -1.36934112604795 | -2.30854434659079 | c |
| 5.52321645591279  | -2.26134097659050 | -4.13966199282045 | h |
| 4.40571288756171  | 1.12771962715304  | -2.30205636825320 | c |
| 4.14515999049930  | 2.22761816685620  | -4.03099943913537 | h |

**C2) Optimized geometry of PhO•...HPy• bi-radical (Pe conformer) in it's A' singlet excited state computed at RICC2/aug-cc-pVDZ level of theory.**

|                   |                   |                   |   |
|-------------------|-------------------|-------------------|---|
| 6.92332023924659  | -1.93151850627933 | 0.00000000000000  | c |
| 6.04283627889931  | -1.00312202895166 | -2.33626170865067 | c |
| 4.12798036055996  | 0.97108482189481  | -2.28699710103771 | c |
| 3.32223364324685  | 1.82764580486018  | 0.00000000000000  | n |
| 4.12798036055996  | 0.97108482189481  | 2.28699710103771  | c |
| 6.04283627889931  | -1.00312202895166 | 2.33626170865067  | c |
| -1.88840719257720 | 3.53497401749324  | 0.00000000000000  | o |
| -3.26564979518873 | 1.48796352901639  | 0.00000000000000  | c |
| -5.97745522692653 | 1.72095011344395  | 0.00000000000000  | c |
| -7.49692919264654 | -0.43967943185510 | 0.00000000000000  | c |
| -6.35016923617396 | -2.85592922762067 | 0.00000000000000  | c |
| -3.68033879152340 | -3.13155111813520 | 0.00000000000000  | c |
| -2.13677912882863 | -0.99654595766833 | 0.00000000000000  | c |
| -6.77381657866890 | 3.63029822565585  | 0.00000000000000  | h |
| -9.55806071620407 | -0.27328053304744 | 0.00000000000000  | h |
| -7.54253938561345 | -4.54704368154962 | 0.00000000000000  | h |
| -2.83927384707706 | -5.02037157917223 | 0.00000000000000  | h |
| -0.07702141983743 | -1.14943388512245 | 0.00000000000000  | h |
| 1.78596219810988  | 3.03007565337533  | 0.00000000000000  | h |
| 3.25915150020115  | 1.84405973713259  | 3.93996441946992  | h |
| 3.25915150020115  | 1.84405973713259  | -3.93996441946992 | h |
| 6.75435047513948  | -1.71634687837982 | 4.13709758768842  | h |
| 6.75435047513948  | -1.71634687837982 | -4.13709758768842 | h |
| 8.35738874938047  | -3.42875417508834 | 0.00000000000000  | h |

**D1) Optimized geometry structure of Pl conformer of PhOH-Py complex in it's A'(³ππ\*) triplet excited state computed at RICC2/aug-cc-pVDZ level of theory.**

|                    |                   |                  |   |
|--------------------|-------------------|------------------|---|
| 3.25767914853403   | 1.61467400067765  | 0.00000000000000 | c |
| 3.36332717299008   | -1.01146690503881 | 0.00000000000000 | c |
| 5.85059799356882   | -2.39984096621371 | 0.00000000000000 | c |
| 8.12423128016269   | -0.93042522885261 | 0.00000000000000 | c |
| 8.01925897860864   | 1.68660552335835  | 0.00000000000000 | c |
| 5.52824139631276   | 3.06076815450812  | 0.00000000000000 | c |
| 1.34259902928692   | -2.59310828942787 | 0.00000000000000 | o |
| -3.28458057968361  | -0.38793057298050 | 0.00000000000000 | n |
| -4.09895956711560  | 2.03980246745123  | 0.00000000000000 | c |
| -6.67007409142744  | 2.70670738842402  | 0.00000000000000 | c |
| -8.49055575602540  | 0.76833847414005  | 0.00000000000000 | c |
| -7.66383156235762  | -1.75932637499092 | 0.00000000000000 | c |
| -5.05248991518809  | -2.24341265441013 | 0.00000000000000 | c |
| -7.22261467023911  | 4.69712761086014  | 0.00000000000000 | h |
| -2.62777499536733  | 3.49371527768996  | 0.00000000000000 | h |
| -4.32331959544953  | -4.17992254416187 | 0.00000000000000 | h |
| -9.00813070126409  | -3.32812119789277 | 0.00000000000000 | h |
| -10.50847576039676 | 1.21755591658985  | 0.00000000000000 | h |
| -0.26328267605846  | -1.56559641058876 | 0.00000000000000 | h |
| 1.41843669673376   | 2.56089627907388  | 0.00000000000000 | h |
| 5.48972517437576   | 5.12277366839063  | 0.00000000000000 | h |
| 9.76674627091484   | 2.79183902165747  | 0.00000000000000 | h |
| 9.95594714067246   | -1.89076143948355 | 0.00000000000000 | h |
| 5.82675431671567   | -4.46170401783672 | 0.00000000000000 | h |

**D2) Optimized geometry of Pe conformer of PhOH-Py complex in it's A'(3ππ\*) triplet excited state computed at RICC2/aug-cc-pVDZ level of theory.**

|                   |                   |                   |   |
|-------------------|-------------------|-------------------|---|
| -5.94586596091166 | 2.01696942953437  | 0.00000000000000  | c |
| -6.38340974259825 | 4.03229397825873  | 0.00000000000000  | h |
| -7.83637124321260 | 0.07669794138873  | 0.00000000000000  | c |
| -9.83655320731531 | 0.60451760737607  | 0.00000000000000  | h |
| -7.14763194089078 | -2.44825710581571 | 0.00000000000000  | c |
| -8.60219014721145 | -3.91804525497465 | 0.00000000000000  | h |
| -4.41264443563528 | -3.22591170571093 | 0.00000000000000  | c |
| -3.91240322524899 | -5.22725517533294 | 0.00000000000000  | h |
| -2.51471767006612 | -1.31335104361738 | 0.00000000000000  | c |
| -0.51278904193382 | -1.83084047776649 | 0.00000000000000  | h |
| -3.21005483380870 | 1.22263025089526  | 0.00000000000000  | c |
| -1.60616072158962 | 3.23045083306671  | 0.00000000000000  | o |
| 0.18998880982371  | 2.59261287399209  | 0.00000000000000  | h |
| 3.18917773641699  | 1.37886292083861  | 0.00000000000000  | n |
| 4.29757172661003  | 0.66279207964738  | -2.19631620911621 | c |
| 4.29757172661003  | 0.66279207964738  | 2.19631620911621  | c |
| 3.33462288274828  | 1.25856184019878  | 3.92797344822697  | h |
| 3.33462288274828  | 1.25856184019878  | -3.92797344822697 | h |
| 6.53516946965484  | -0.76551260071111 | -2.28884783941418 | c |
| 6.53516946965484  | -0.76551260071111 | 2.28884783941418  | c |
| 7.35121498910322  | -1.29528380901903 | 4.11157905654354  | h |
| 7.35121498910322  | -1.29528380901903 | -4.11157905654354 | h |
| 7.67698754791047  | -1.49465001708386 | 0.00000000000000  | c |
| 9.41666236514769  | -2.61152376941506 | 0.00000000000000  | h |
